# Supplementary material for: Efficient single-atom Ni for catalytic transfer hydrogenation of furfural to furfuryl alcohol
Source: Royal Society of Chemistry journal article supplement (doi:10.1039/d0ta10838c), 2020-12-09
Supplement: d0ta10838c1.pdf [file d0ta10838c1.pdf]

## Supporting Information

### Efficient single-atom Ni for catalytic transfer hydrogenation of furfural to furfuryl alcohol

*Yafei Fan,<sup>a</sup> Changfu Zhuang,<sup>a\*</sup> Shangjing Li,<sup>a</sup> Ying Wang,<sup>a</sup> Xiaoqin Zou,<sup>b\*</sup> Xiaoteng Liu,<sup>c\*</sup> Weimin Huang<sup>d</sup> and Guangshan Zhu<sup>b</sup>*

<sup>a</sup>Key Laboratory of Forest Resources Conservation and Utilization in the Southwest Mountains of China Ministry of Education, School of Chemical Engineering, Southwest Forestry University, Kunming 650051, P. R. China.

<sup>b</sup>Faculty of Chemistry, Northeast Normal University, Changchun 130024, P. R. China.

<sup>c</sup>Department of Mechanical and Construction Engineering, Faculty of Engineering and Environment, Northumbria University, Newcastle upon Tyne, NE1 8ST, United Kingdom.

<sup>d</sup>College of Chemistry, Jilin University, Changchun 130012, P. R. China.

*\*Corresponding authors*

Dr. Changfu Zhuang

E-mail: cfzhuang@swfu.edu.cn

Prof. Xiaoqin Zou

E-mail: zouxq100@nenu.edu.cn

Prof. Terence Xiaoteng Liu

E-mail: xiaoteng.liu@ncl.ac.uk

#### **Chemical and reagents**

Ni(acac)<sub>2</sub>·2H<sub>2</sub>O, Ni(NO<sub>3</sub>)<sub>2</sub>·6H<sub>2</sub>O and Zn(NO<sub>3</sub>)<sub>2</sub>·6H<sub>2</sub>O were purchased from Adamas Reagent Co., Ltd. Dimethylimidazole was obtained from TCI (Shanghai) Development Co., Ltd. Furfural, furfuryl alcohol, methyl alcohol, ethyl alcohol, n-Propanol, 2-Propanol, n-Butanol, 2-Butanol and substrate extension chemicals were purchased from Sinopharm Chemical Reagent Co., Ltd. In addition, the commercial noble metals catalysts were purchased from Aladdin Reagent. All chemicals were used without further treatments.

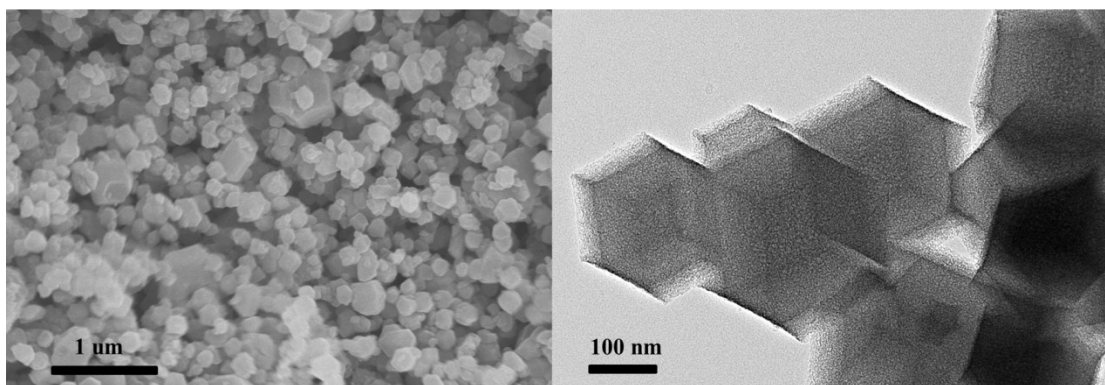

**Figure S1.** SEM and TEM of Ni@ZIF-8.

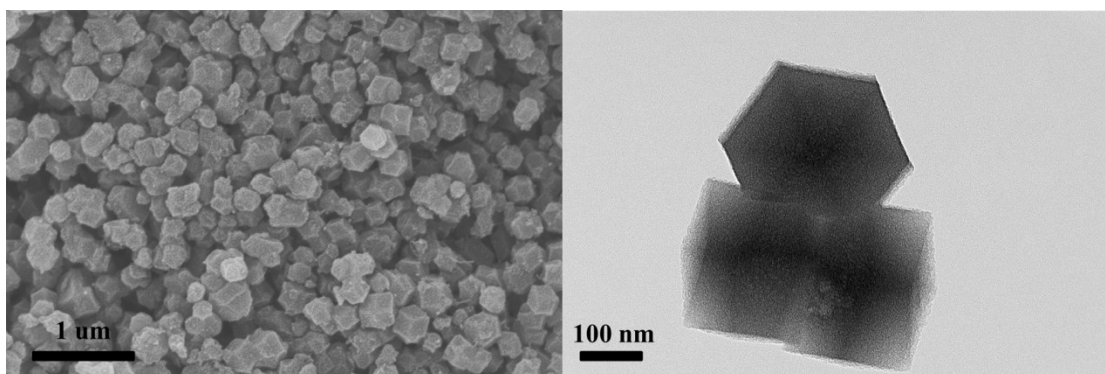

**Figure S2.** SEM and TEM of Ni-SAs/NC.

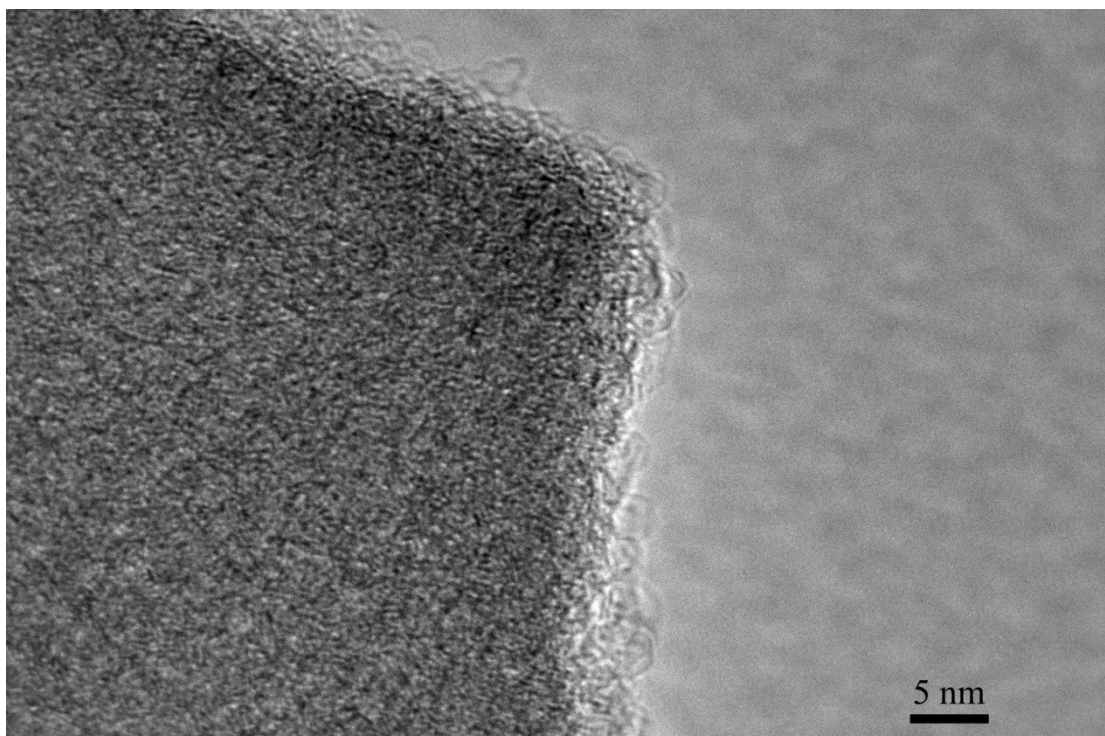

**Figure S3.** HR-TEM of Ni-SAs/NC.

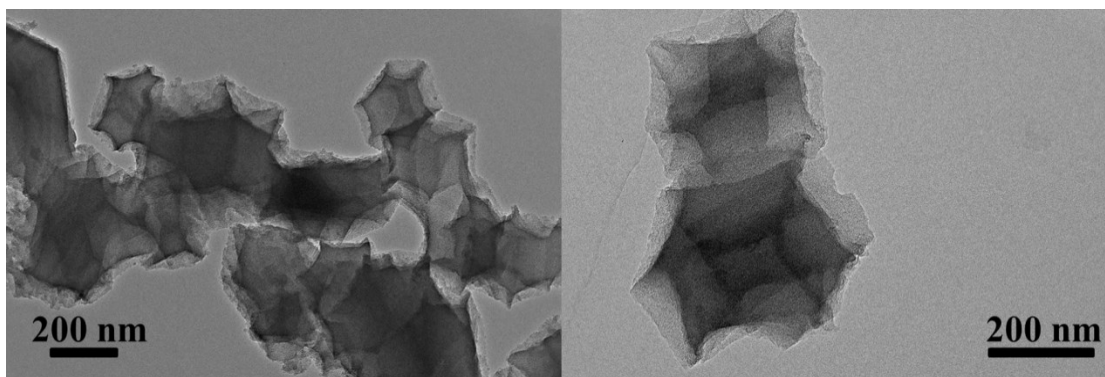

**Figure S4.** TEM of Ni-NPs/NC.

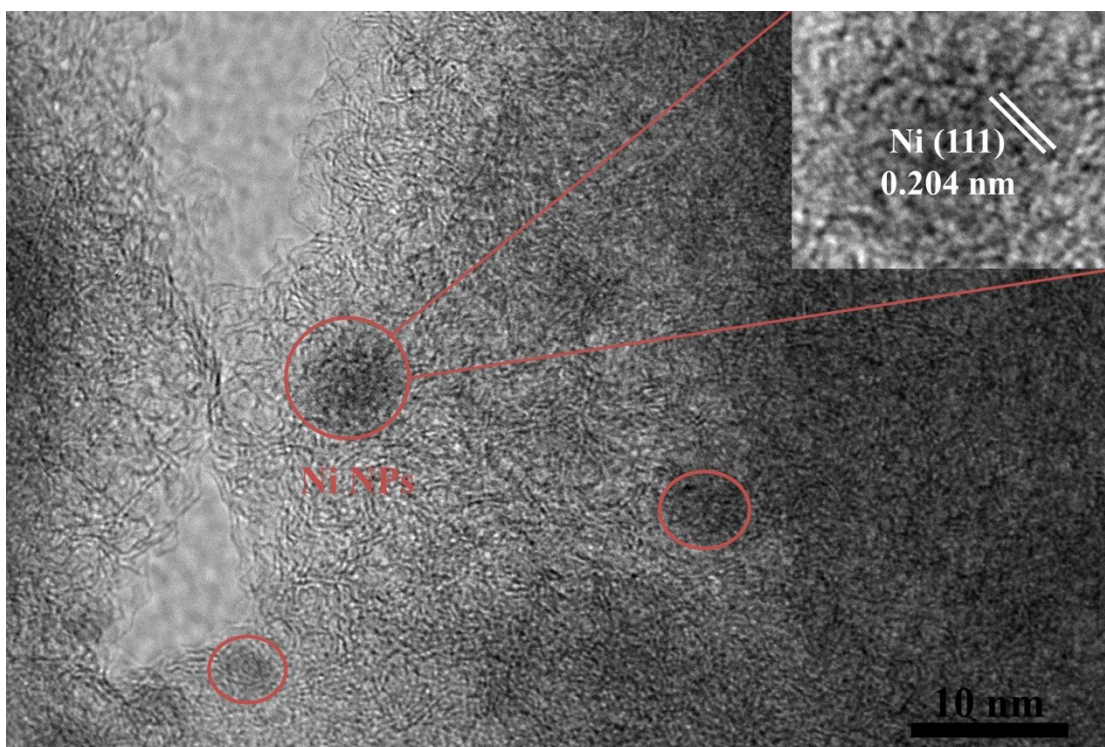

**Figure S5.** HR-TEM of Ni-NPs/NC.

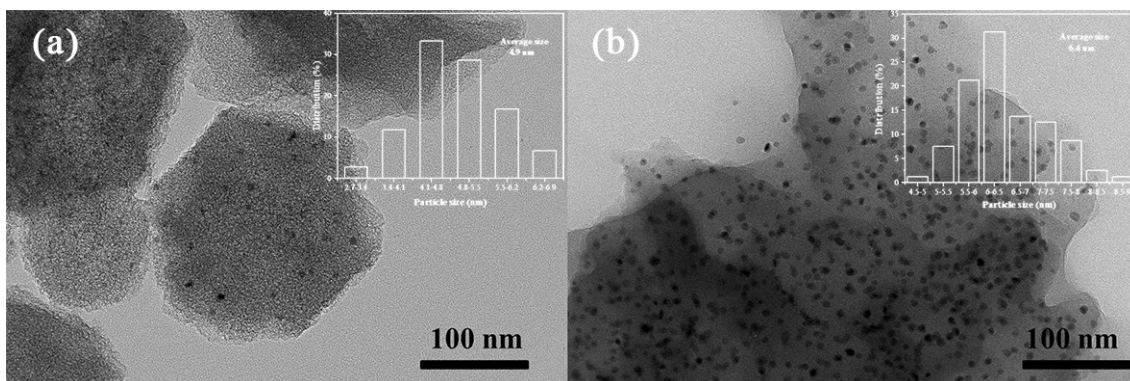

**Figure S6.** (a) TEM of Ni/NC, (b) TEM of Ni/AC.

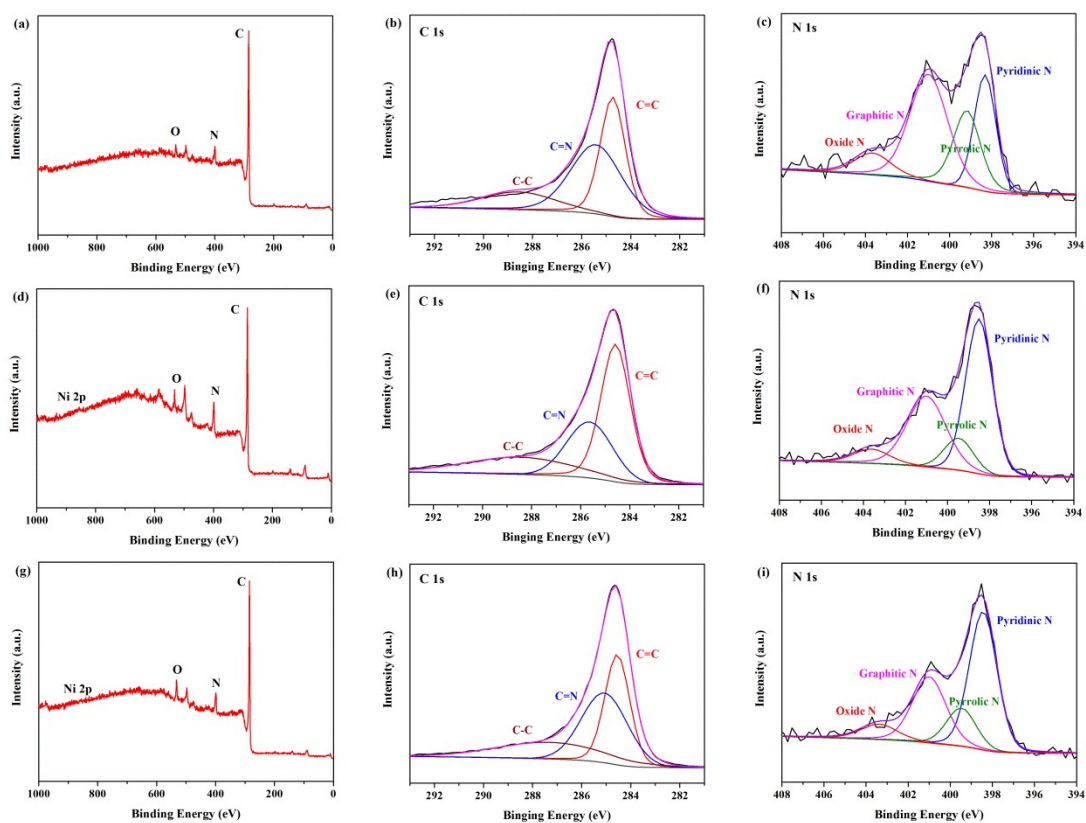

**Figure S7.** (a), (b) and (c) XPS spectra of NC; (d), (e) and (f) XPS spectra of Ni-SAs/NC; (g), (h) and (i) XPS spectra of Ni-NPs/NC;

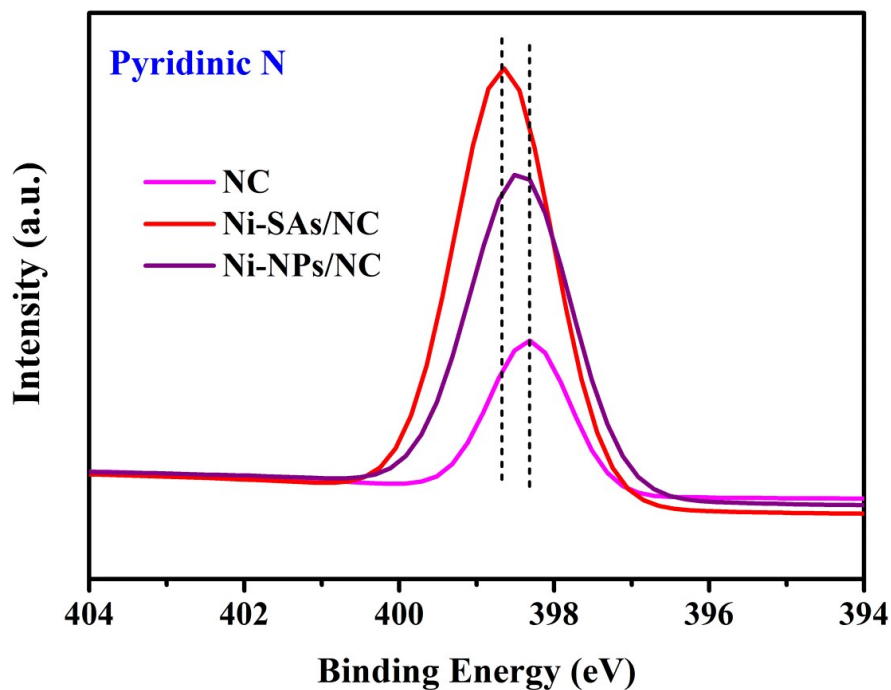

**Figure S8.** Pyridinic-N of NC; Ni-SAs/NC and Ni-NPs/NC.

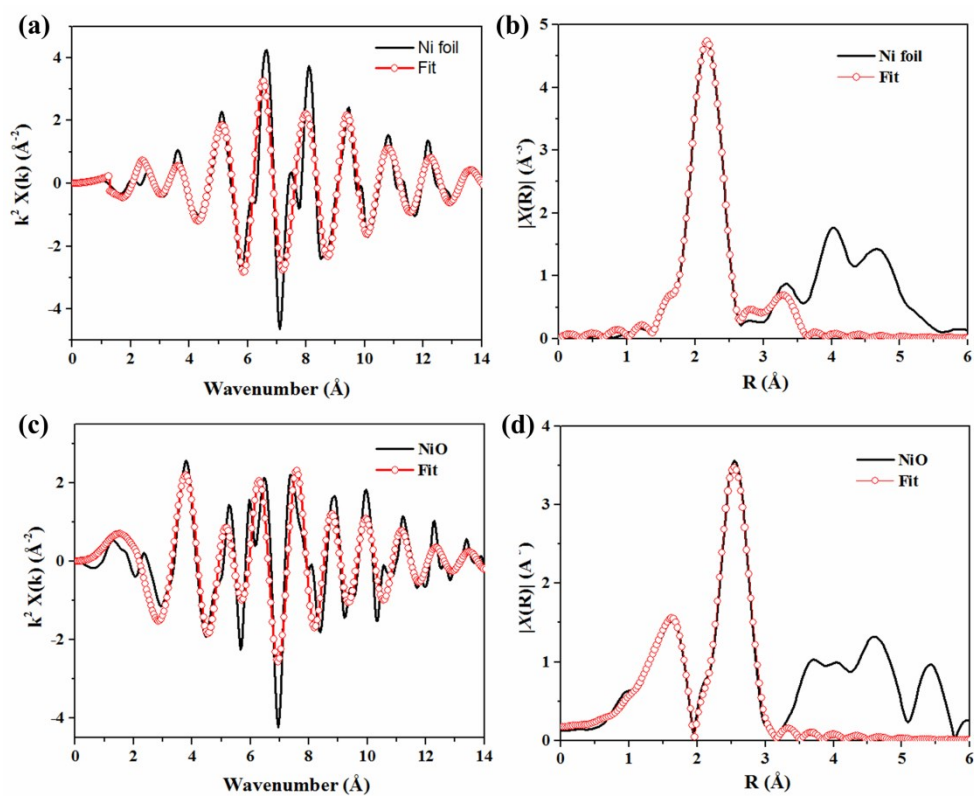

**Figure S9.** (a) and (b) the corresponding EXAFS fitting curves of Ni foil. (c) and (d) the corresponding EXAFS fitting curves of NiO.

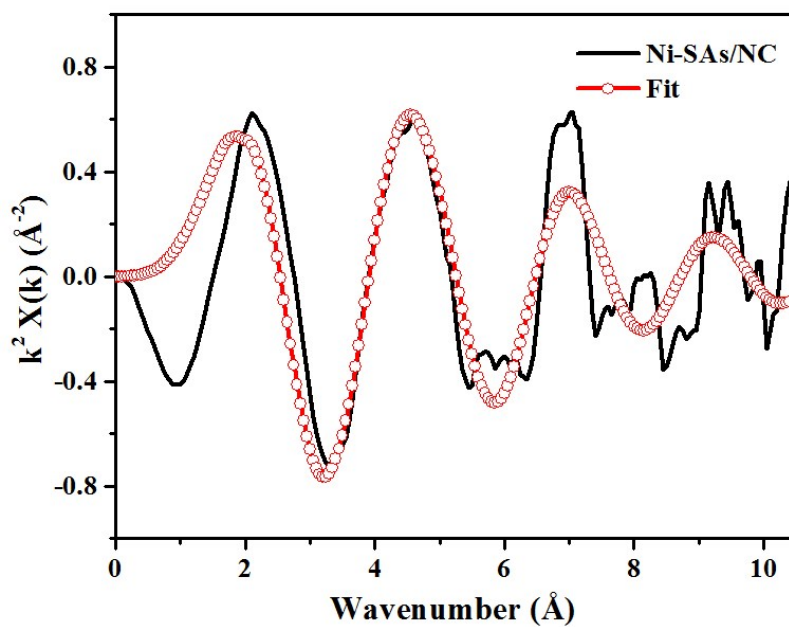

**Figure S10.** The corresponding EXAFS k space fitting curves of Ni-SAs/NC.

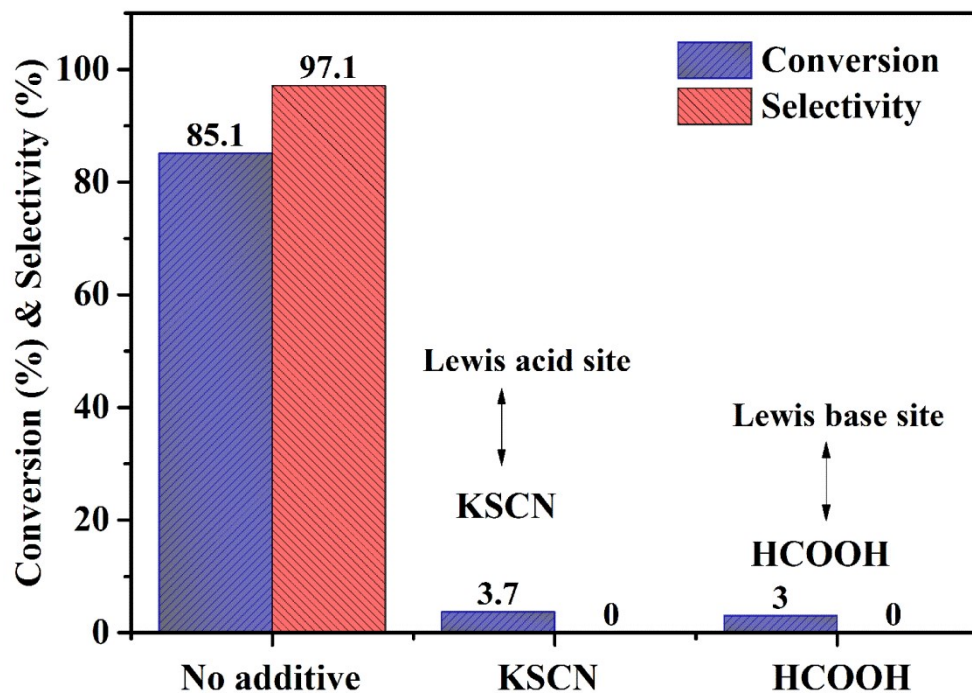

**Figure S11.** Control experiments in CTH of FF to FAL. Before the reaction, a specified amount of KSCN or HCOOH were injected into the reaction system. Reaction conditions: 1 mmol FF, 8 mL 2-propanol, 25 mg catalyst, 120 °C, 3 h, 2 MPa N<sub>2</sub>

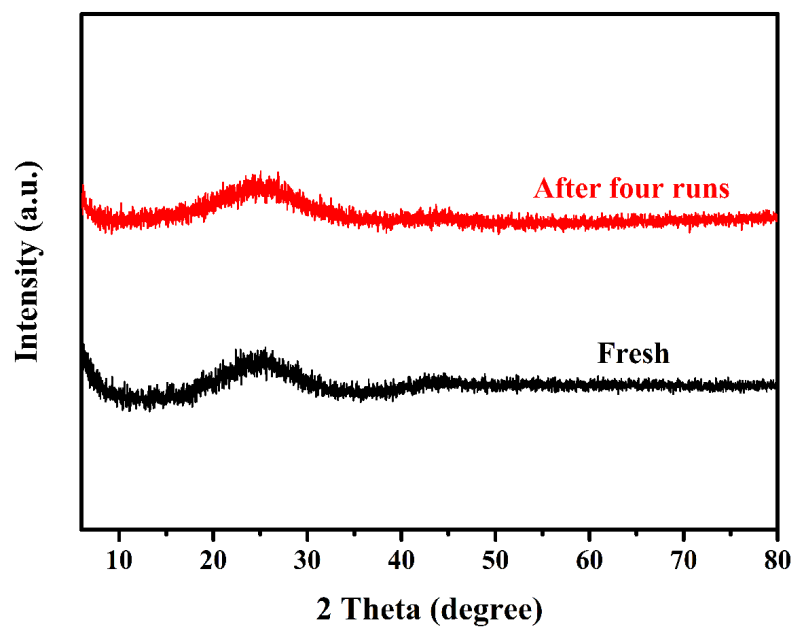

**Figure S12.** XRD patterns of the fresh and reused Ni-SAs/NC catalyst.

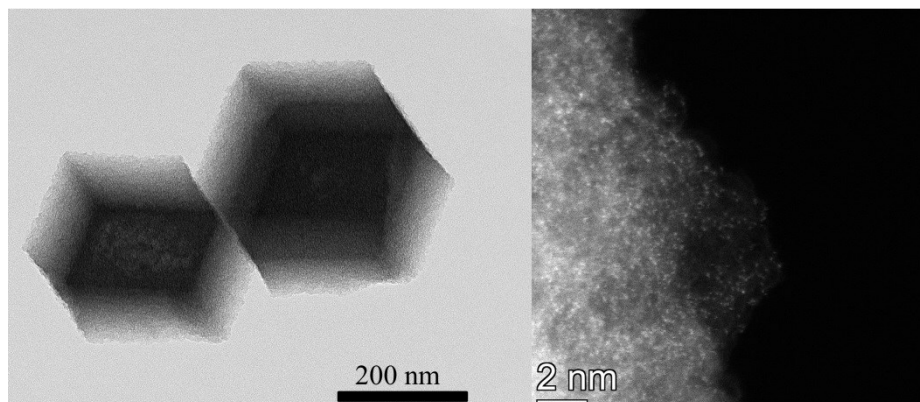

**Figure S13.** TEM and HAADF-STEM images of the reused Ni-SAs/NC catalyst.

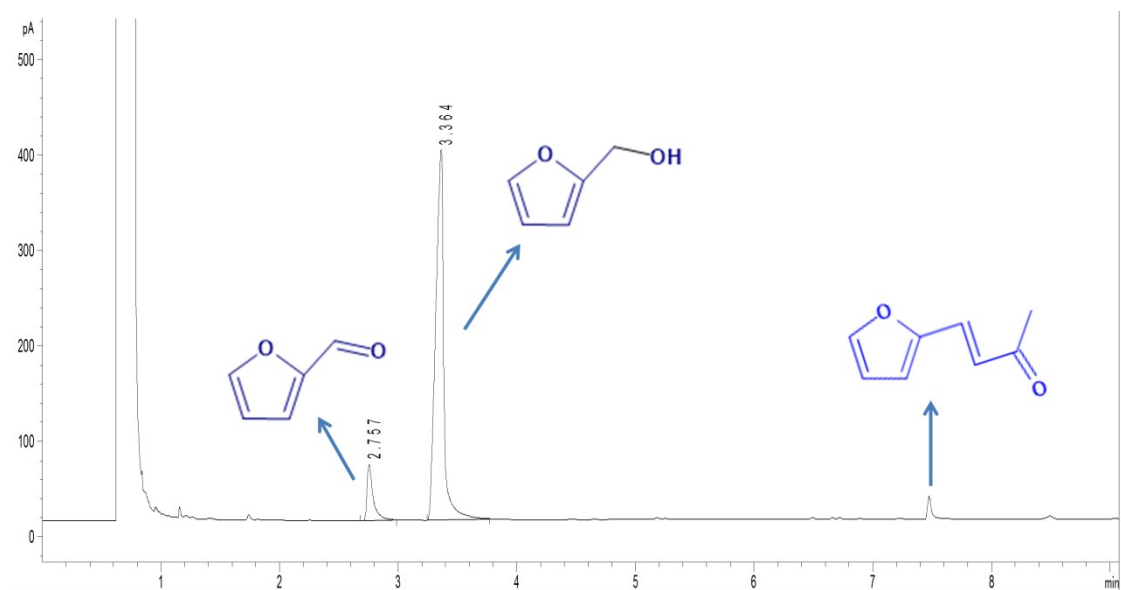

**Figure S14.** GC spectra with the main retention times (from GC-MS) of the reaction mixtures catalyzed by Ni-SAs/NC catalyst

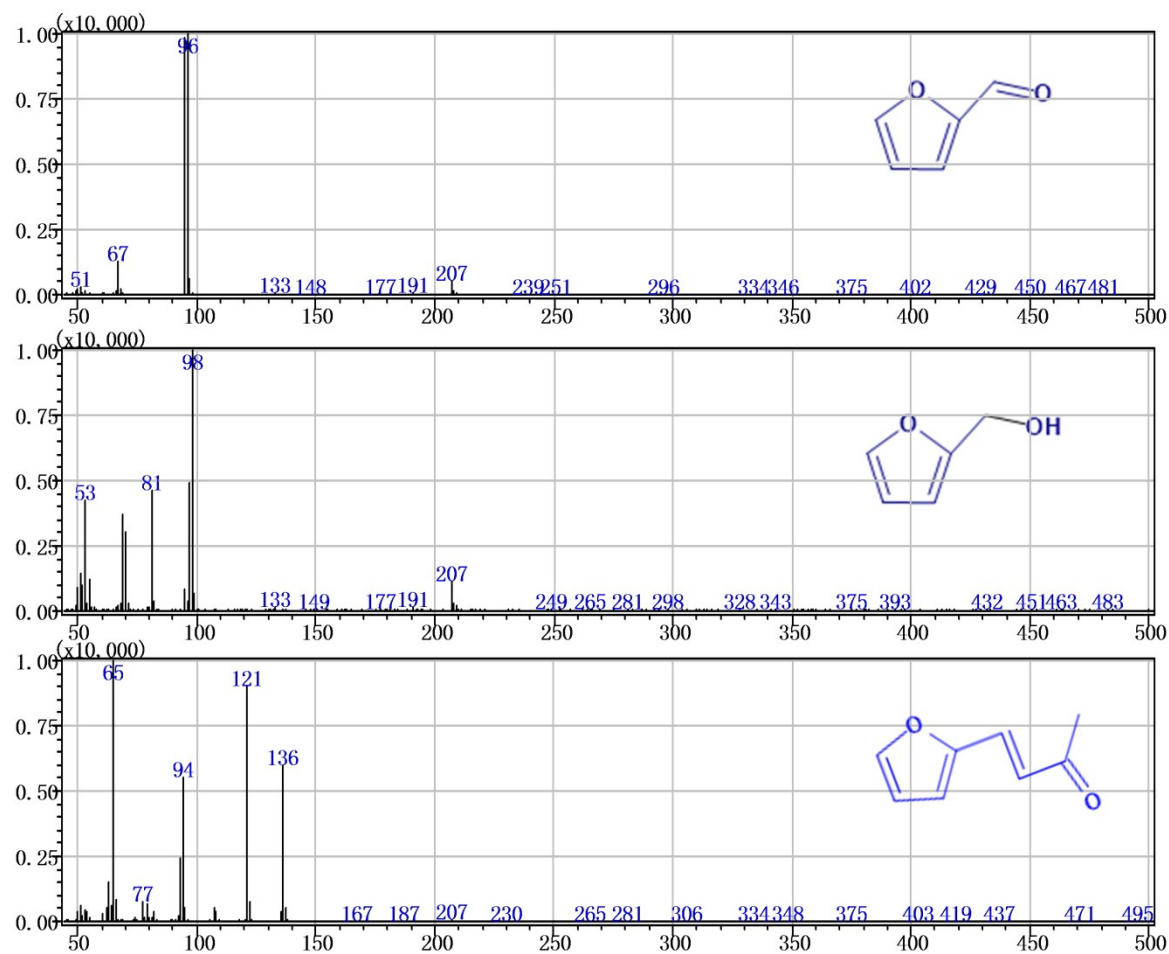

**Figure S15.** Representative MS spectra of the reaction mixture in FF hydrogenation.



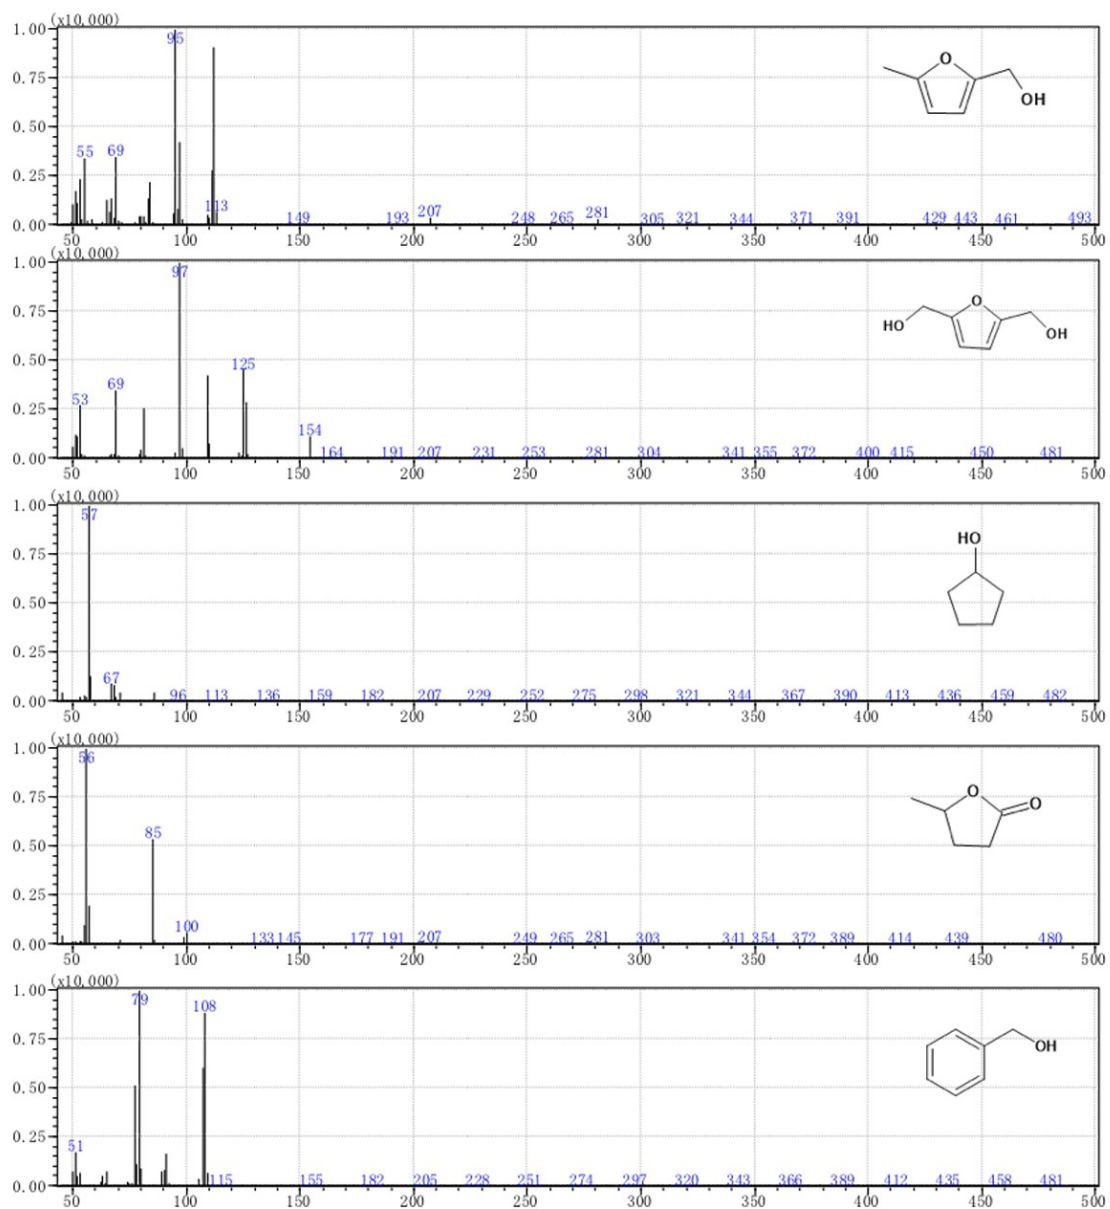

**Figure S16.** Representative MS spectra (from GC-MS) of the reaction products in Table 2.

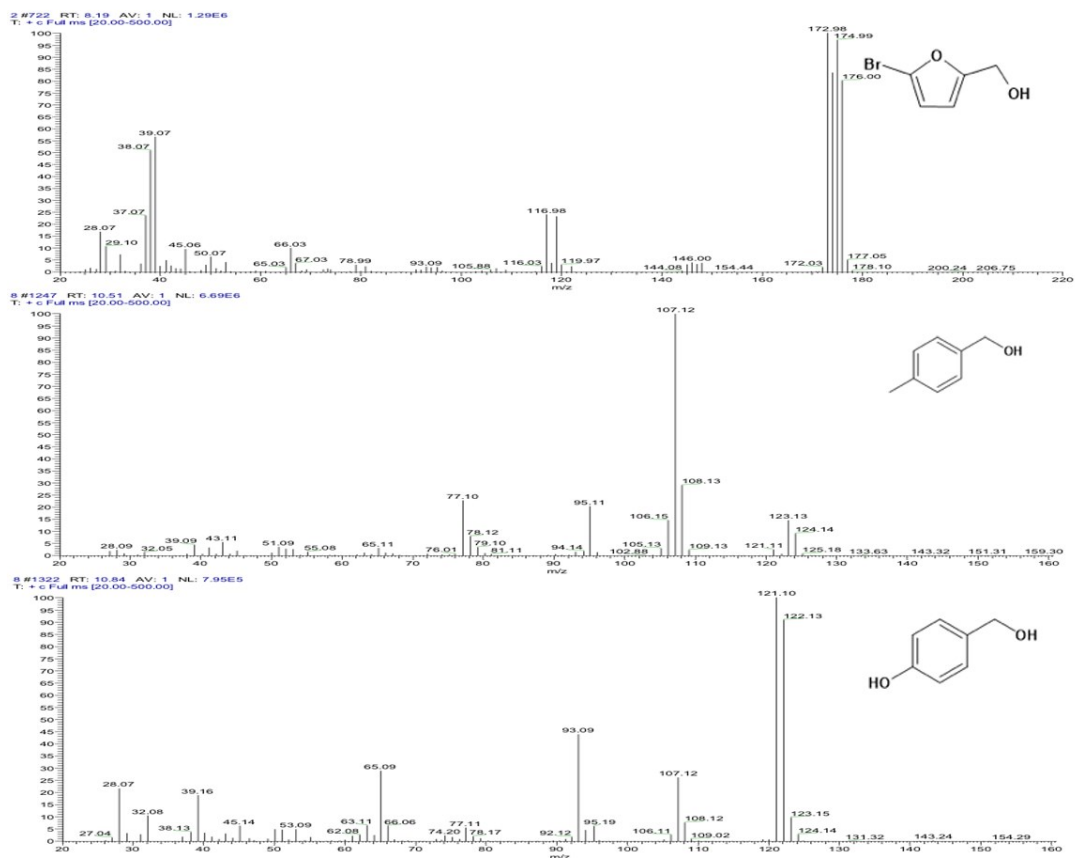

**Figure S17.** Representative MS spectra (from GC-MS) of the reaction products in Table 2.

**Table S1.** The specific surface area, average pore volume, pore size and Ni content.<sup>a</sup>

| Sample    | S <sub>BET</sub><br>(m <sup>2</sup> g <sup>-1</sup> ) | Pore volume<br>(cm <sup>3</sup> g <sup>-1</sup> ) | Average pore<br>size (nm) | Ni <sup>b</sup><br>(wt %) |
|-----------|-------------------------------------------------------|---------------------------------------------------|---------------------------|---------------------------|
| Ni@ZIF-8  | 1910                                                  | 0.64                                              | 1.45                      | 0.05                      |
| NC        | 1183                                                  | 0.37                                              | 1.79                      | -                         |
| Ni-SAs/NC | 1037                                                  | 0.32                                              | 2.07                      | 0.12                      |
| Ni-NPs/NC | 954                                                   | 0.31                                              | 1.87                      | 0.65                      |
| Ni/NC     | 1114                                                  | 0.27                                              | 2.35                      | 4.39                      |
| Ni/AC     | 1275                                                  | 0.21                                              | 2.67                      | 5.16                      |

<sup>a</sup>: by ASAP 2020 Plus, <sup>b</sup>: by ICP-OES.

**Table S2.** The XPS element analysis of different samples.

| Sample    | C     | N     | O     | Ni   |
|-----------|-------|-------|-------|------|
| Ni@ZIF-8  | 75.01 | 19.49 | 4.69  | 0.23 |
| NC        | 91.29 | 6.32  | 2.39  | -    |
| Ni-SAs/NC | 84.18 | 12.35 | 3.33  | 0.15 |
| Ni-NPs/NC | 86.43 | 8.66  | 4.63  | 0.89 |
| Ni/NC     | 82.11 | 8.97  | 6.67  | 1.52 |
| Ni/AC     | 88.52 | -     | 10.31 | 1.18 |

**Table S3.** Ni K-edge EXAFS curves fitting parameters.<sup>a</sup>

| Sample                 | Path    | N    | $\Delta E$ (eV) | R ( $\text{\AA}$ ) | $\sigma^2$ ( $\text{\AA}^2$ ) | R-factor |
|------------------------|---------|------|-----------------|--------------------|-------------------------------|----------|
| Ni foil <sup>b</sup>   | Ni-Ni1  | 12   | 0.67            | 0.38               | 0.47                          | 0.006    |
|                        | Ni-Ni2  | 6    | 0.67            | 1.35               | 1.63                          |          |
| NiO <sup>c</sup>       | Ni-O    | 6    | 1.34            | 1.24               | 1.17                          | 0.004    |
|                        | Ni-Ni   | 12   | 0.81            | 0.54               | 0.51                          |          |
| Ni-SAs/NC <sup>d</sup> | Ni-N(O) | 4.46 | 3.91            | 1.98               | 3.14                          | 0.017    |

<sup>a</sup> N, coordination number; R, distance between absorber and backscatter atoms;  $\sigma^2$ , Debye-Waller factor to account for both thermal and structural disorders;  $\Delta E$ , inner potential correction; R-factor indicates the goodness of the fit. <sup>b</sup> Fitting range:  $3.0 \leq k$  ( $\text{\AA}^{-1}$ )  $\leq 12.4$  and  $1.0 \leq R$  ( $\text{\AA}$ )  $\leq 3.6$ . <sup>c</sup> Fitting range:  $3.0 \leq k$  ( $\text{\AA}^{-1}$ )  $\leq 11.5$  and  $1.0 \leq R$  ( $\text{\AA}$ )  $\leq 3.0$ . <sup>d</sup> Fitting range:  $3.0 \leq k$  ( $\text{\AA}^{-1}$ )  $\leq 10.4$  and  $1.0 \leq R$  ( $\text{\AA}$ )  $\leq 2.2$ .

**Table S4.** Summary of different catalysts for selective hydrogenation of FF to FAL.

|    | Catalyst                              | Reaction temperature (°C) | Reaction time (h) | Conv. (%) | Selec. (%) | Activation energy (kJ/mol) | Ref.      |
|----|---------------------------------------|---------------------------|-------------------|-----------|------------|----------------------------|-----------|
| 1  | Fe <sub>2</sub> O <sub>3</sub> @HAP   | 180                       | 10                | 96.2      | 95.3       | 47.69                      | [1]       |
| 2  | Co <sub>3</sub> O <sub>4</sub> /MC    | 160                       | 1                 | 99.0      | 99.0       | -                          | [2]       |
| 3  | NiFe <sub>2</sub> O <sub>4</sub>      | 180                       | 6                 | 99.0      | 95.0       | 48.2                       | [3]       |
| 4  | Cu/MgO-Al <sub>2</sub> O <sub>3</sub> | 210                       | 1                 | 100       | 89.0       | -                          | [4]       |
| 5  | Cu-Mg-Al                              | 150                       | 6                 | 100       | 100        | -                          | [5]       |
| 6  | DyCl <sub>3</sub> -Ru/C               | 180                       | 3                 | 98.0      | 97.0       | -                          | [6]       |
| 7  | Mn-NCA-700                            | 160                       | 1                 | 98.0      | 85.0       | 83.0                       | [7]       |
| 8  | Zr-SBA-15                             | 90                        | 6                 | 65.0      | 45.0       | -                          | [8]       |
| 9  | ZJU-199-350                           | 130                       | 3                 | 97.1      | 99         | -                          | [9]       |
| 10 | ZrPN                                  | 100                       | 15                | 93.0      | 96.8       | 70.5                       | [10]      |
| 11 | Zr-LS                                 | 80                        | 3                 | 97.0      | 97.0       | 52.25                      | [11]      |
| 12 | Ni-SAs/NC                             | 130                       | 2                 | 95.6      | 96.8       | 36.86                      | This work |

## Reference

- [1] F. Wang, Z. Zhang, *ACS Sustainable Chem. Eng.*, 2016, **5**, 942-947.
- [2] G.-H. Wang, X. Deng, D. Gu, K. Chen, H. Tüysuz, B. Spliethoff, H. J. Bongard, C. Weidenthaler, W. Schmidt, F. Schüth, *Angew. Chem., Int. Ed.* 2016, **55**, 11101–11105.
- [3] J. He, S. Yang, A. Riisager, *Catal. Sci. Technol.*, 2018, **8**, 790-797.
- [4] H. Chen, H. Ruan, X. Lu, J. Fu, T. Langrish, X. Lu, *Mol Catal.*, 2018, **445**, 94-101.
- [5] M.M. Villaverde, T.F. Garetto, A.J. Marchi, *Catal. Commun.*, 2015, **58**, 6-10.
- [6] P. Panagiotopoulou, N. Martin, D.G. Vlachos, *ChemSusChem*, 2015, **8**, 2046-2054.
- [7] S. Zhou, G. Chen, X. Feng, M. Wang, T. Song, D. Liu, F. Lu, H. Qi, *Green Chem.*, 2018, **20**, 3593-3603.
- [8] Y. Sha, Z. Xiao, H. Zhou, K. Yang, Y. Song, N. Li, R. He, K. Zhi, Q. Liu, *Green Chem.*, 2017, **19**, 4829-4837.
- [9] K. Chen, J.-L.L, C-D Wu, *Angew. Chem., Int. Ed.*, 2020, **132**, 1941 – 1947.
- [10] J. Song, B. Zhou, H. Zhou, L. Wu, Q. Meng, Z. Liu, B. Han, *Angew. Chem., Int. Ed.* 2015, **54**, 9399-403.
- [11] S. Zhou, F. Dai, Z. Xiang, T. Song, D. Liu, F. Lu, H. Qi, *Appl. Catal., B*, 2019, **248**, 31-43.
